# Supplementary material for: Orobol, an Enzyme-Convertible Product of Genistein, exerts Anti-Obesity Effects by Targeting Casein Kinase 1 Epsilon
Source: PubMed Central journal article supplement (PMC6586855; doi:10.1038/s41598-019-43950-9), 2019-06-20

1 **Supplementary information**

2 **Orobol, an Enzyme-Convertible Product of Genistein, exerts Anti-Obesity Effects by Targeting Casein**  
3 **Kinase 1 Epsilon**

4 Hee Yang<sup>1,2,†</sup>, Sang-Hyuk Lee<sup>3,†</sup>, Hae Ji<sup>1,2,†</sup>, Jong-Eun Kim<sup>4,†</sup>, Ra Yoo<sup>1,2</sup>, Jong Hun Kim<sup>1,5</sup>, Sujin Suk<sup>1,2</sup>, Chul  
5 Sung Huh<sup>6</sup>, Jung Han Yoon Park<sup>2</sup>, Yong-Seok Heo<sup>7</sup>, Han-Seoung Shin<sup>8</sup>, Byung-Gee Kim<sup>9,\*</sup>, Ki Won Lee<sup>1,2,10,\*</sup>

6  
7 <sup>1</sup>Department of Agricultural Biotechnology and Research Institute of Agriculture and Life Sciences, Seoul  
8 National University, Seoul 08826, Republic of Korea

9 <sup>2</sup>Advanced Institutes of Convergence Technology, Seoul National University, Suwon 16229, Republic of  
10 Korea

11 <sup>3</sup>Interdisciplinary Program for Biochemical Engineering and Biotechnology, Seoul National University,  
12 Seoul 08826, Republic of Korea

13 <sup>4</sup>Research Institute of Biotechnology and Medical Converged Science, Dongguk University, Goyang 10326,  
14 Republic of Korea

15 <sup>5</sup>Department of Food Science and Biotechnology, Sungshin University, Seoul 01133, Republic of Korea

16 <sup>6</sup>Graduate School of International Agricultural Technology, Seoul National University, Pyeongchang 25354,  
17 Gangwon-do, Republic of Korea

18 <sup>7</sup>Department of Chemistry, Konkuk University, Seoul 05030, Republic of Korea

19 <sup>8</sup>Department of Food Science and Biotechnology and Food and Biosafety Research Center, Dongguk  
20 University-Seoul, Ilsandong-gu, Gyeonggi-do 10326 Republic of Korea

21 <sup>9</sup>School of Chemical and Biological Engineering, Seoul National University, Seoul 08826, Republic of  
22 Korea

23 <sup>10</sup>BOBSNU Co., Ltd., Suwon 16229, Gyeonggi-do, Republic of Korea

24  
25 <sup>†</sup>These authors contributed equally to this work.

26 **\*Address correspondence to:**

27 Ki Won Lee, Major in Biomodulation, Department of Agricultural Biotechnology and Research Institute for

1 Agriculture and Life Sciences, Seoul National University, Seoul 08826, Republic of Korea. Tel.: +82-2-880-  
2 4662; Fax: +82-2-873-5095; E-mail: [kiwon@snu.ac.kr](mailto:kiwon@snu.ac.kr)

3 Byung-Gee Kim, School of Chemical and Biological Engineering, Seoul National University, Seoul  
4 National University, Seoul 08826, Republic of Korea Tel: +82-2-880-6896; Fax: +82-2-882-4158; E-mail:  
5 [byungkim@snu.ac.kr](mailto:byungkim@snu.ac.kr)  
6

7 **Supplement Figure 1. Effects of Orobol blocked the G1 phase during mitotic clonal expansion.** Cells  
8 were harvested at the indicated time after the initiation of differentiation with or without Orobol treatment and  
9 stained with PI solution for flow cytometer cell cycle analysis. The histogram results indicate cell cycle  
10 distribution in G1, S or G2/M phases. Data were represented as mean  $\pm$  SEM values of at least three  
11 independent experiments. To compare the differences among the groups, one-way ANOVA was used with  
12 Duncan's multiple range tests. Different letters indicated statistically significant differences at  $p < 0.05$ .

13  
14 **Supplement Figure 2. Effects of CK1 $\epsilon$  inhibitor on MDI-induced adipogenesis.** (A) After cell  
15 differentiation, 3T3-L1 adipocytes were stained with Oil red O and images were captured. (B) Quantification  
16 of intracellular lipid content. (C) Orobol does not exhibit cytotoxicity in 3T3-L1 preadipocytes up to 40  $\mu$ M.  
17 Data are represented as means  $\pm$  SEM from at least three independent experiments. The sharps (##) indicate  
18 a significant difference between the control group and the group treated with the MDI cocktail alone ( $p <$   
19  $0.01$ ). Means with different letters (a–d) within a graph are significantly different between groups treated with  
20 MDI alone and those treated with MDI plus PF5006739

21  
22 **Supplement Figure 3. Effects of orobol on MDI-induced signaling in 3T3-L1 preadipocytes.**

23 Western blot analysis for Akt, mTor and p70<sup>S6K</sup> in MDI-induced signaling in 3T3-L1 preadipocytes. The data  
24 are representative of three independent experiments that gave similar results.

25 **Supplement Figure 4.** Effects of orobol on the liver weight in HFD-fed mice. Orobol treatment for 23  
26 weeks decreased the weight of liver tissue in HFD-fed mice. Values are expressed as means  $\pm$  SEM. The  
27 sharp (#) indicates a significant difference between the control group and the group treated with HFD ( $p <$   
28  $0.05$ ). The means marked with '\*' indicate significantly different compared to the group treated with HFD ( $p$   
29  $< 0.05$ )  
30

1 **Supplement Fig.5.** These are uncropped blot images corresponding to data show in Figure 3.

2

3 **Supplement Fig.6.** These are uncropped blot images corresponding to data show in Figure 4A.

4

5 **Supplement Fig.7.** These are uncropped blot images corresponding to data show in Figure 4B.

6

7 **Supplement Table 1.** Inhibition of kinase activity by 20  $\mu$ M orobol

# Supplement Figure 1

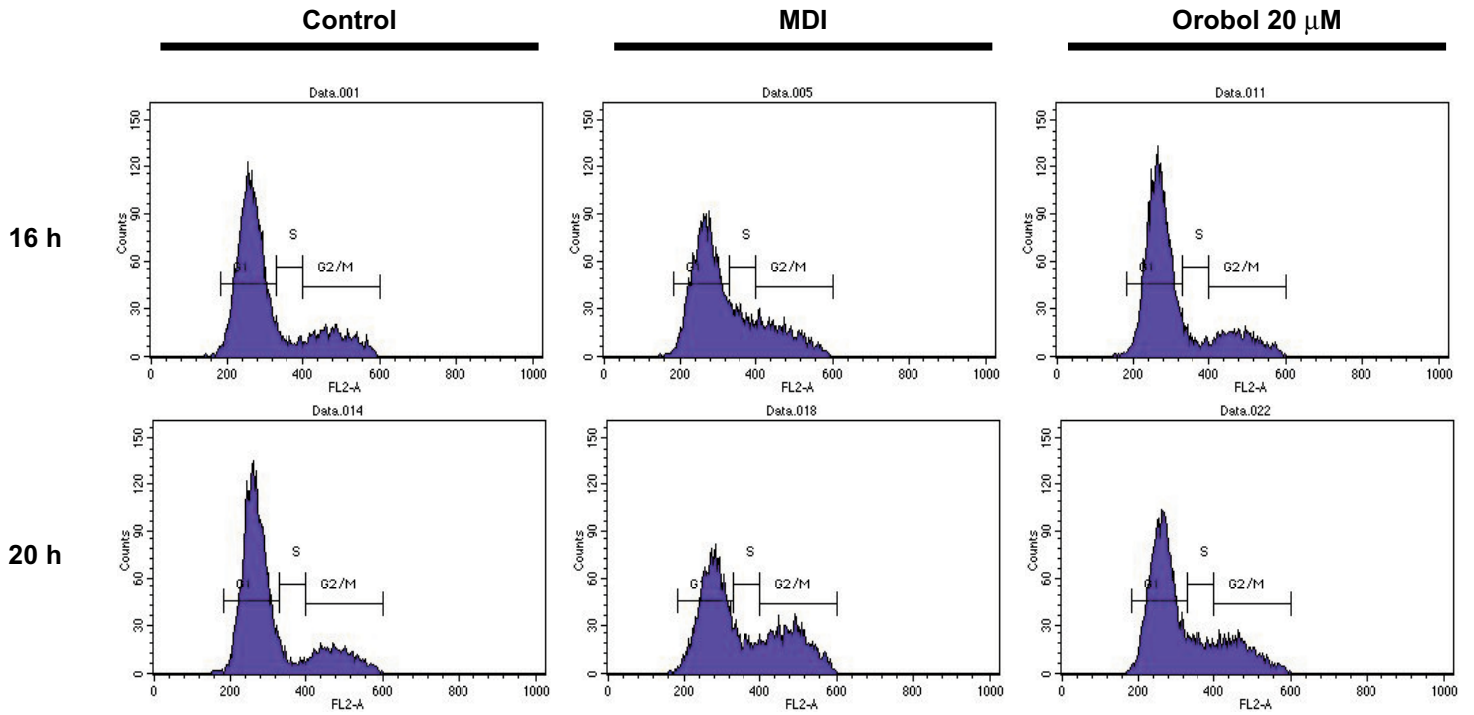

## A

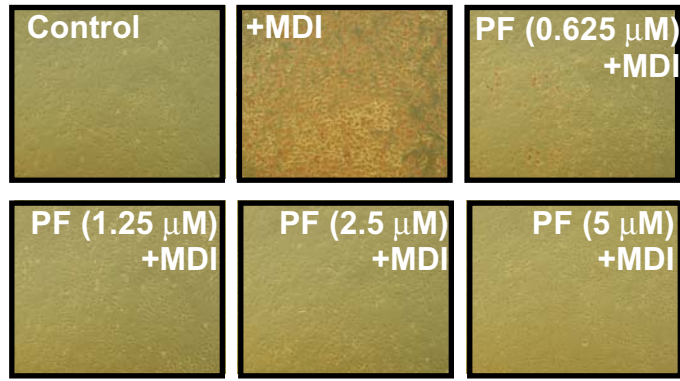

## B

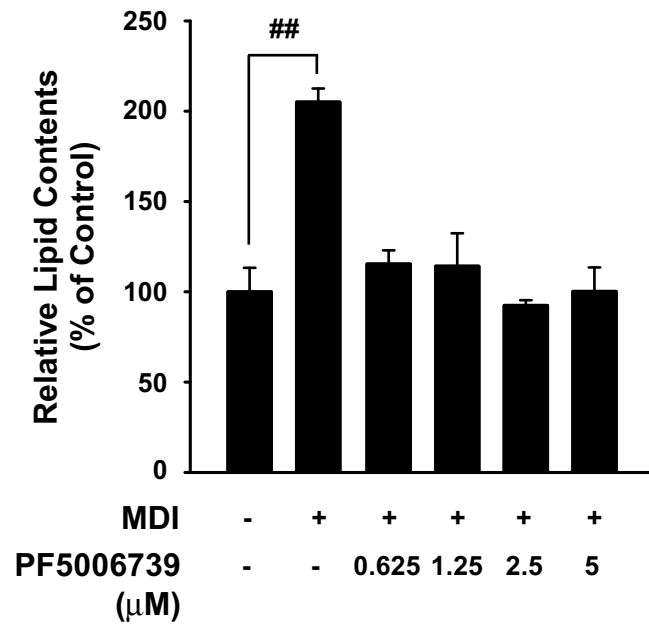

## C

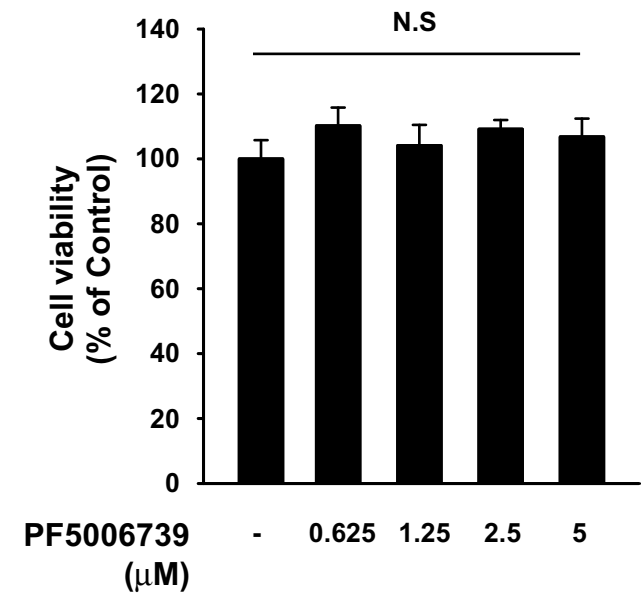

# Supplement Figure 3

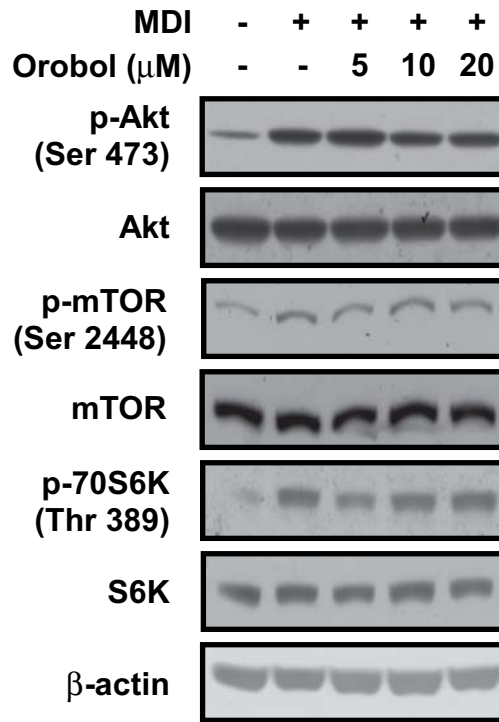

## A

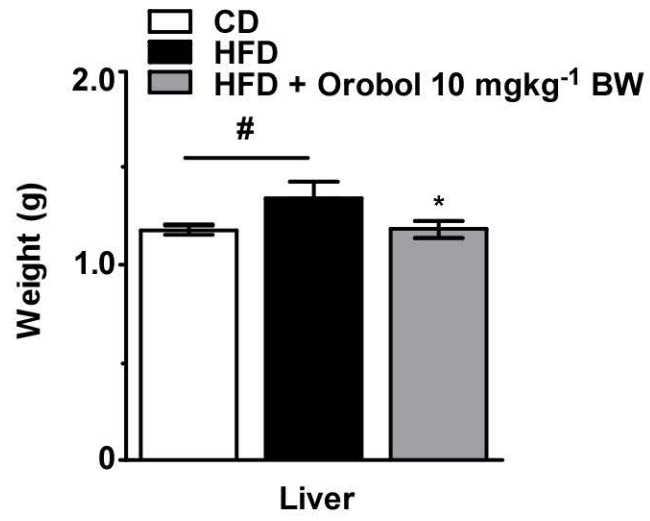

# Supplement Figure 5

Figure 3B

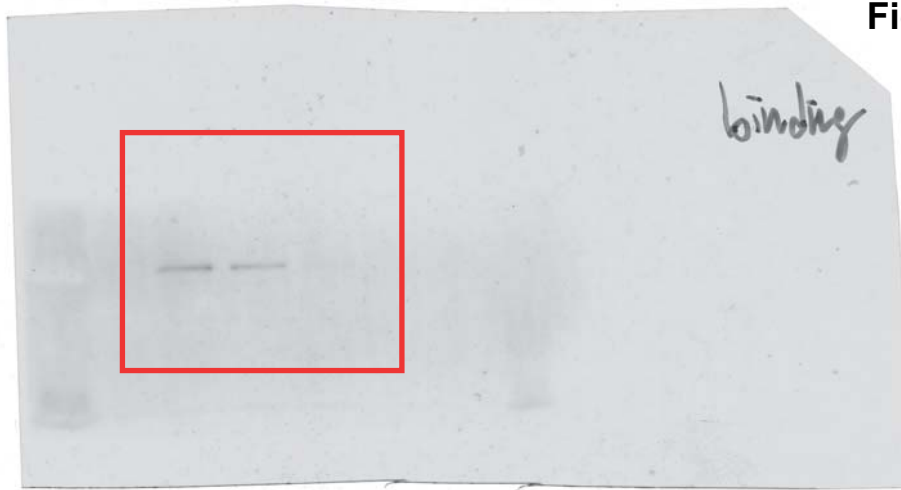

Figure 3B

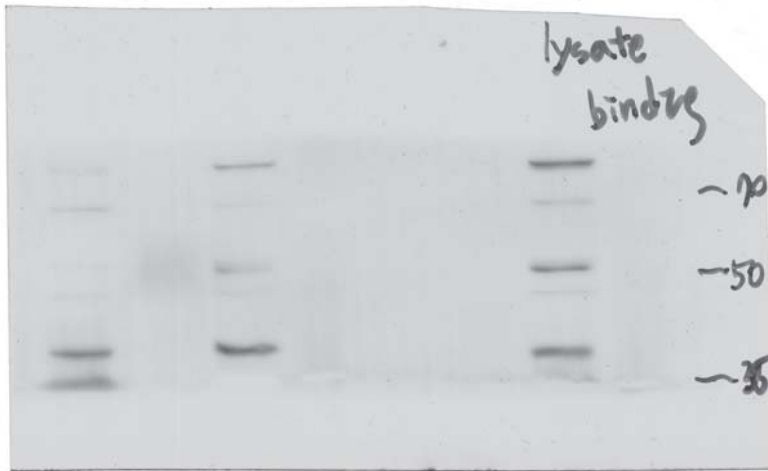

Figure 3B

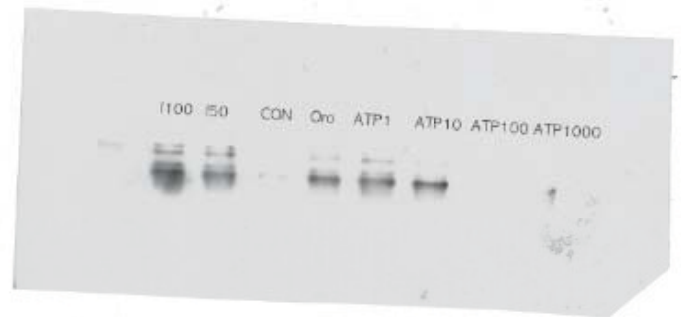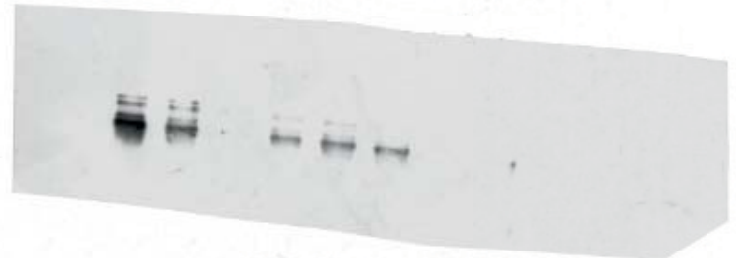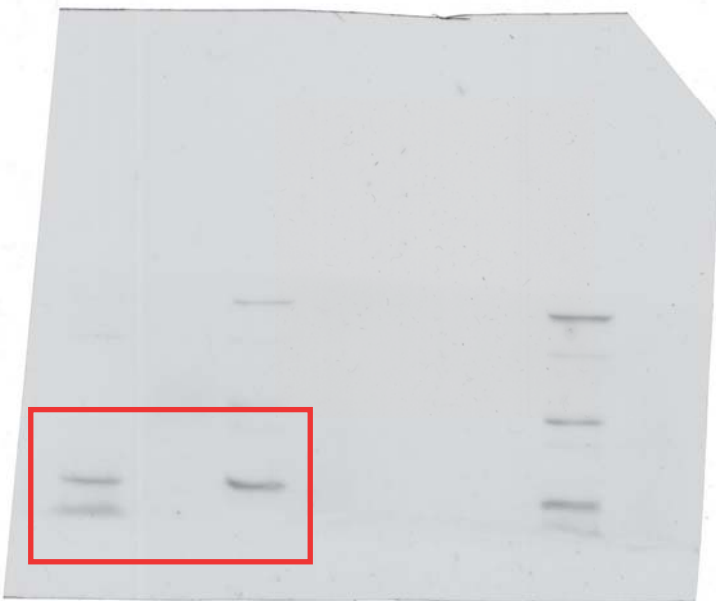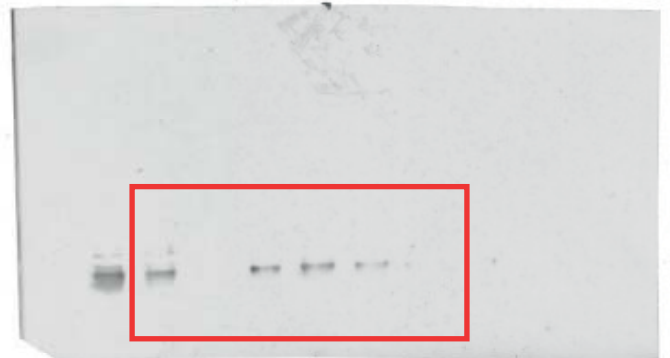



# Supplement Figure 6

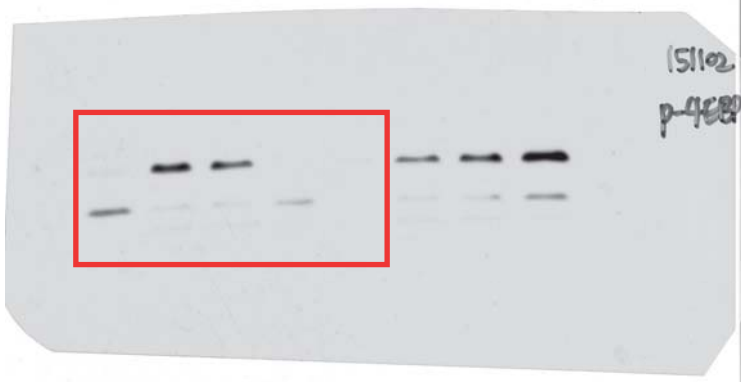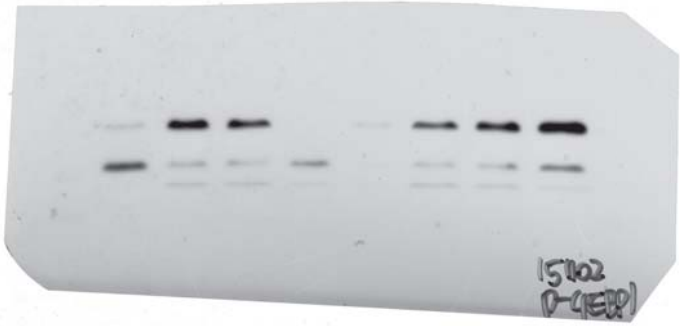

- 1. Control
- 2. MDI
- 3. Orobol 5 +MDI
- 4. Orobol 10 +MDI
- 5. Orobol 20 +MDI

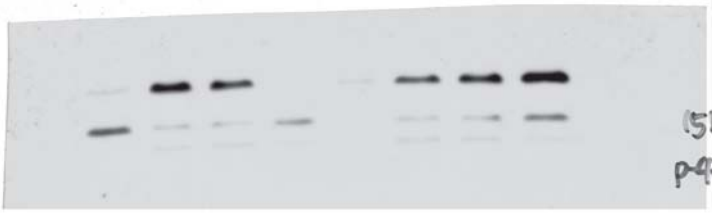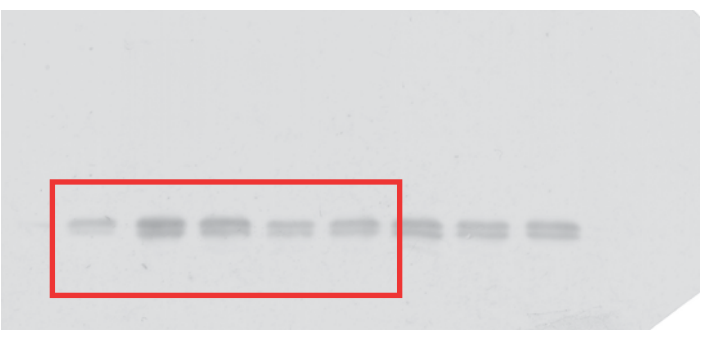

- 1. Control
- 2. MDI
- 3. Orobol 5 +MDI
- 4. Orobol 10 +MDI
- 5. Orobol 20 +MDI

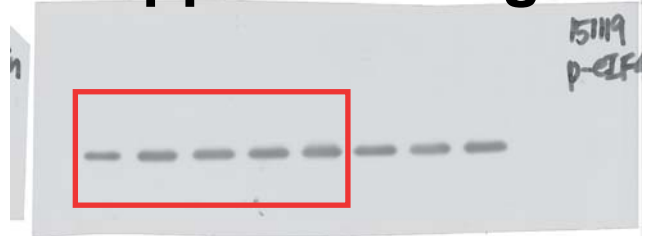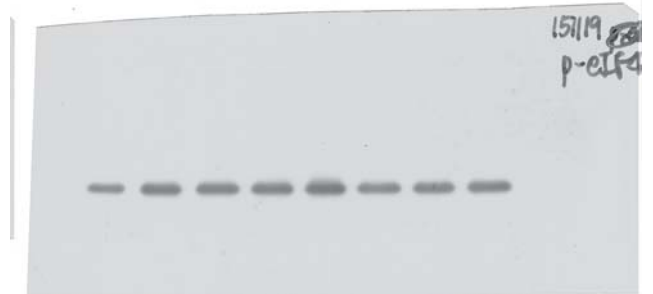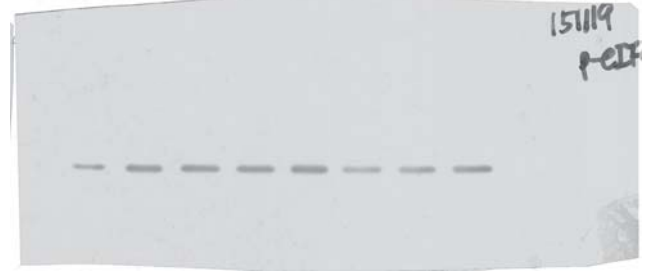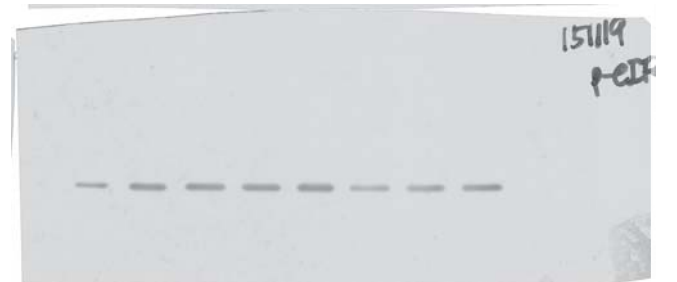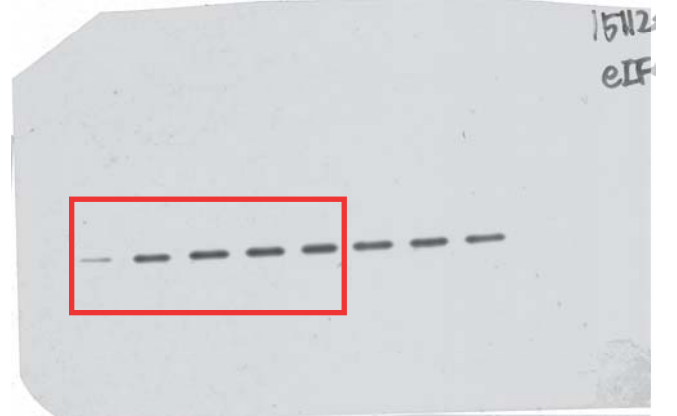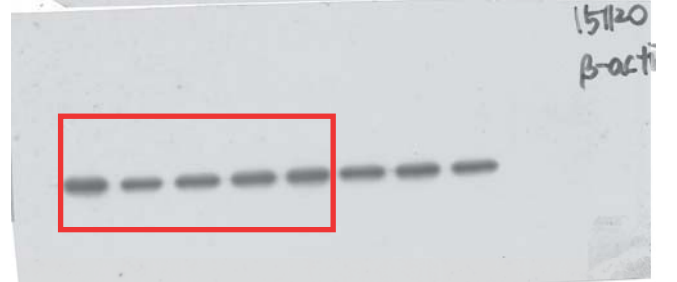

# Supplement Figure 7

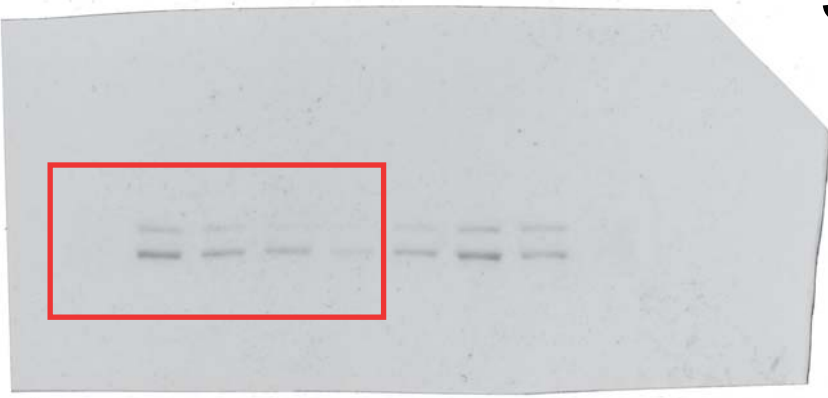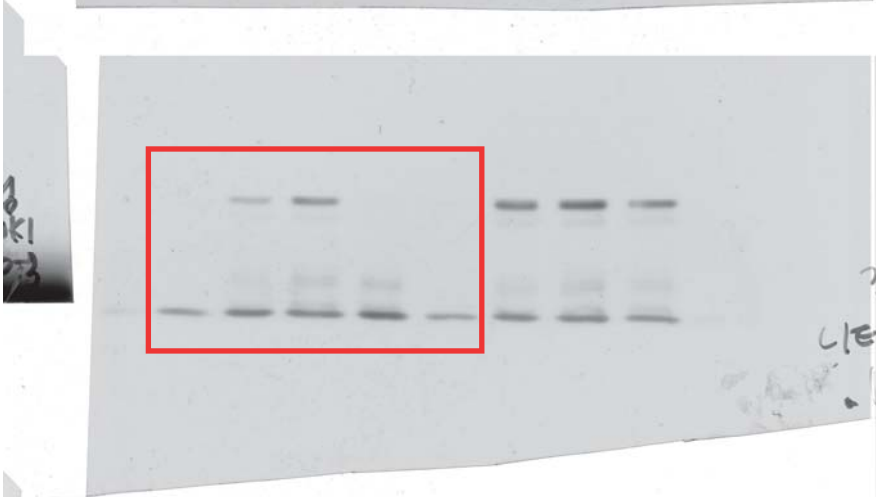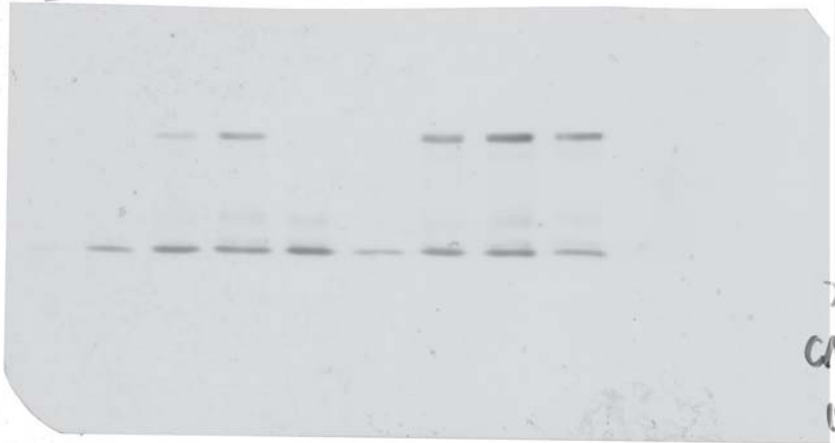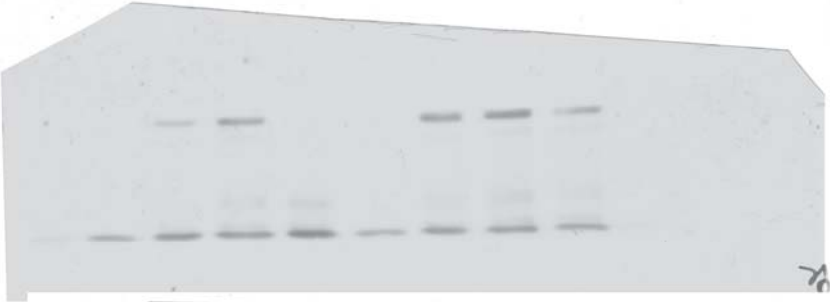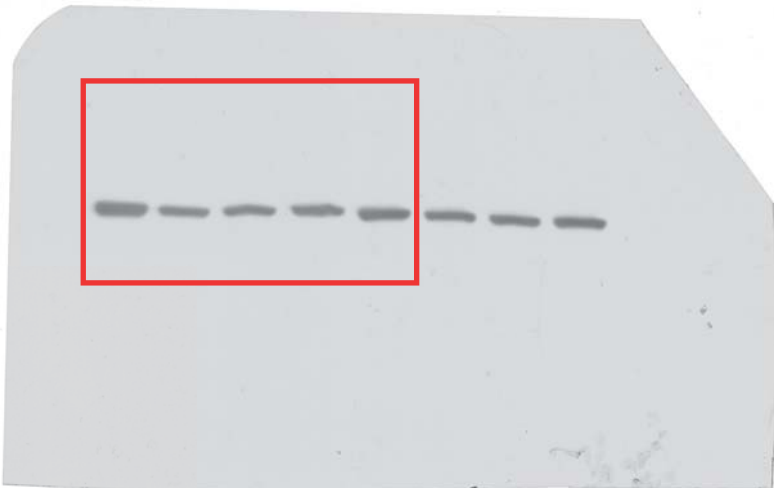

# Supplement Figure 8

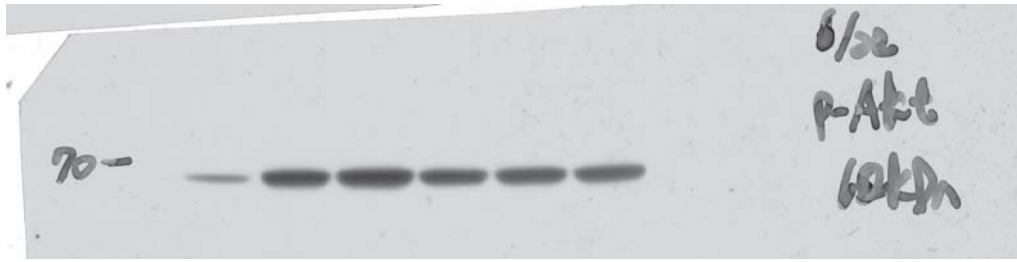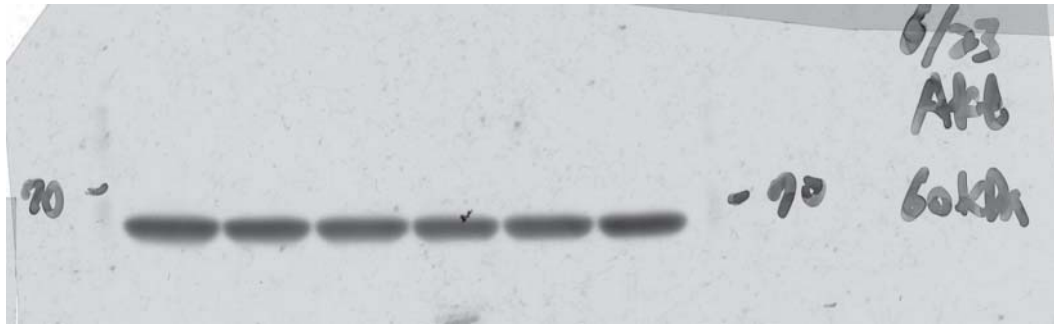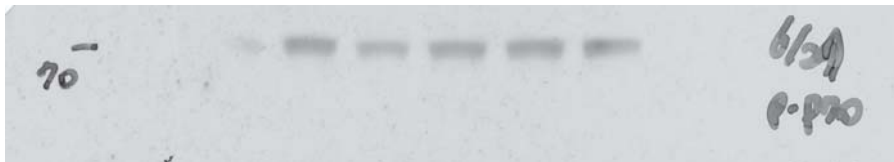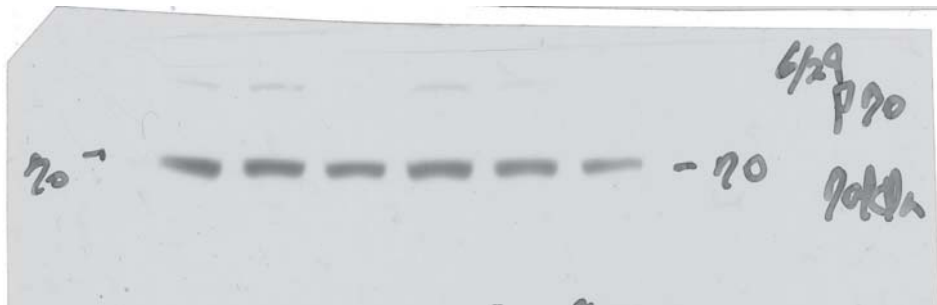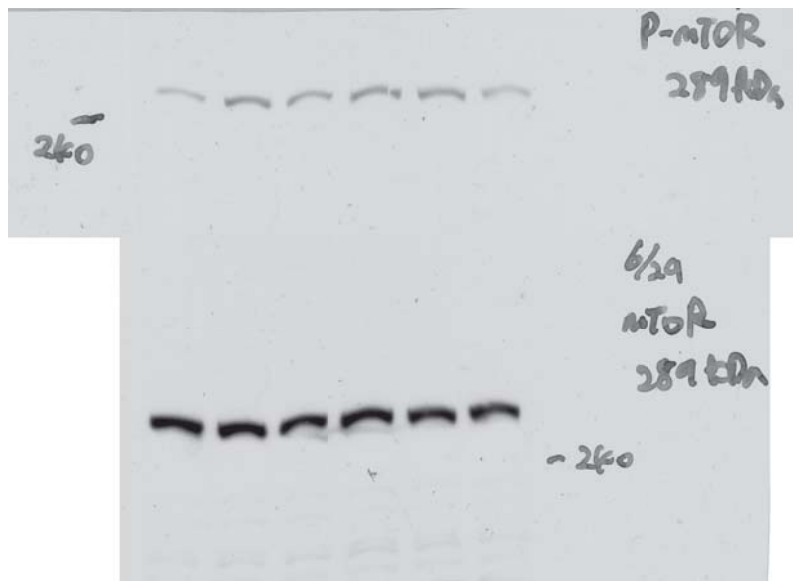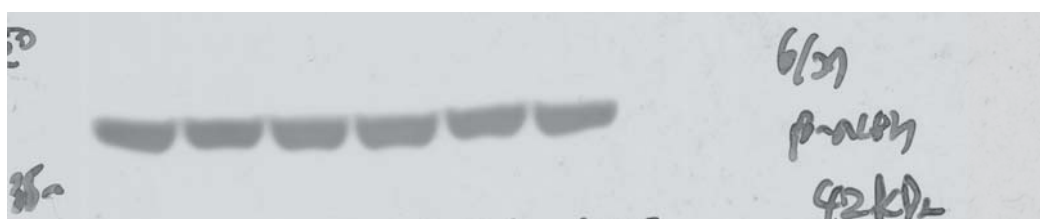

Supplement: 41598_2019_43950_MOESM1_ESM.pdf [file 41598_2019_43950_MOESM1_ESM.pdf]
